# Supplementary material for: Structure of Bi2Rh3Se2 above and below charge density wave transition determined by Bi Lα and Lγ X-ray fluorescence holography
Source: Royal Society of Chemistry journal article supplement (doi:10.1039/d4cp02694b), 2024-01-01
Supplement: d4cp02694b1.pdf [file d4cp02694b1.pdf]

## Supporting Information

Structure of  $\text{Bi}_2\text{Rh}_3\text{Se}_2$  above and below charge density wave transition  
determined by Bi  $L\alpha$  and  $L\gamma$  X-ray fluorescence holography

Zhiyan Zhang<sup>1</sup>, Ritsuko Eguchi,<sup>1</sup> Halubai Sekhar,<sup>2</sup> Koji Kimura,<sup>2</sup> Naohisa Happo,<sup>3</sup>  
Yuki Yamamoto,<sup>1</sup> Masaki Utsumi,<sup>1</sup> Hidenori Goto,<sup>1</sup> Koichi Hayashi,<sup>2</sup> and Yoshihiro  
Kubozono<sup>1\*</sup>

<sup>1</sup>Research Institute for Interdisciplinary Science, Okayama University, Okayama  
700-8530, Japan

<sup>2</sup>Department of Physical Science and Technology, Nagoya Institute of Technology,  
Nagoya 466-8585, Japan

<sup>3</sup>Graduate School of Information Sciences, Hiroshima City University, Hiroshima  
731-3194, Japan

## Contents

The XRD pattern of  $\text{Bi}_2\text{Rh}_3\text{Se}_2$  is shown in Figure S1, together with the calculated pattern based on Le Bail analysis with the large  $\beta$ -cell structure. The atomic arrangements which are predicted to be observed as reconstructed atomic image at  $z = 0 \text{ \AA}$  in the small  $\beta$ -cell, large  $\beta$ -cell and supercell structures are shown in Figure S2. Table S1 – S3 provides the atomic coordinates employed for the model structures of  $\text{Bi}_2\text{Rh}_3\text{Se}_2$  (small  $\beta$ -cell, large  $\beta$ -cell and supercell structures). These atomic coordinates are basis for experimental determination of crystal structures using X-ray fluorescence holograms.

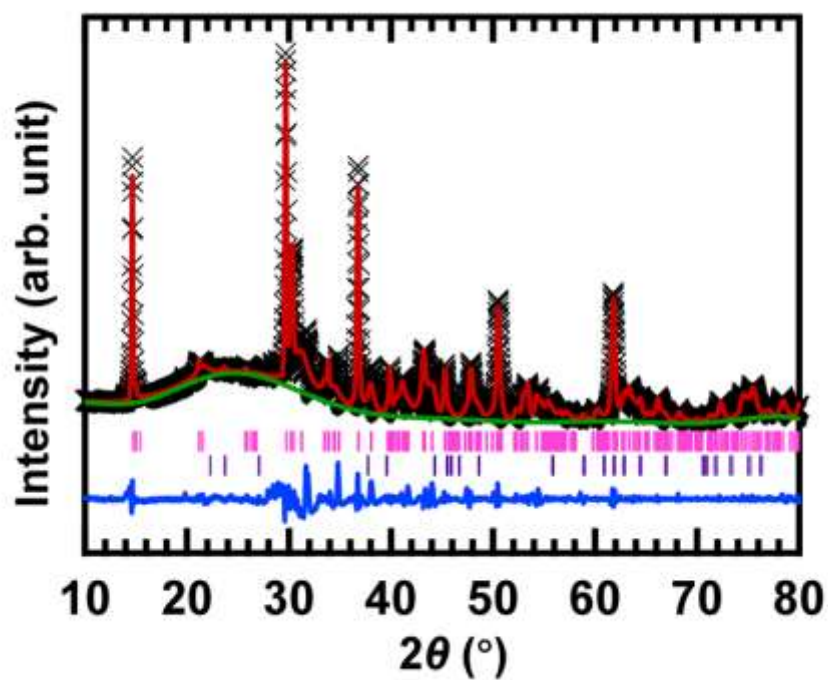

Figure S1. Powder XRD pattern of  $\text{Bi}_2\text{Rh}_3\text{Se}_2$ . The black symbols (x) and red lines refer to the experimental and calculated patterns, and pink and purple sticks refer to the positions of Bragg reflections due to  $\text{Bi}_2\text{Rh}_3\text{Se}_2$  and Bi, respectively. The blue lines refer to the difference between the experimental and calculated patterns. The calculation was made by Le Bail analysis with large  $\beta$ -cell structure (see text) under the space group of  $C2/m$  (No. 9).

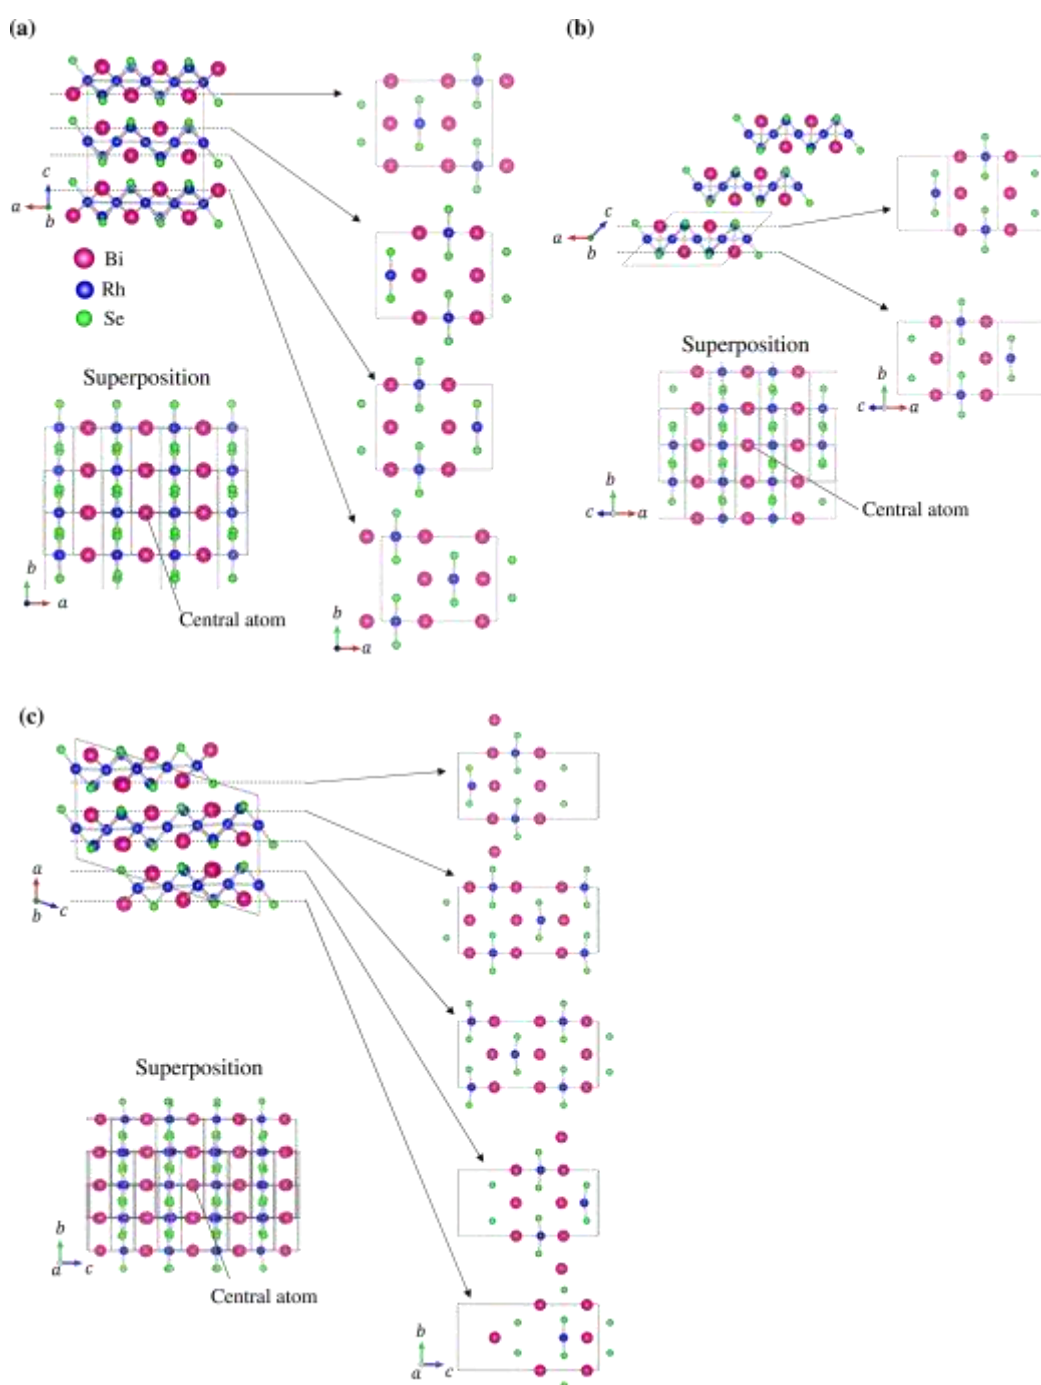

Figure S2. Schematic representations of (a) small  $\beta$ -cell, (b) large  $\beta$ -cell and (c) supercell structures. The used atomic coordinates and lattice constants are listed in Tables S1–S3 of Supporting Information. The reconstructed atomic image at  $z = 0$  corresponds to the superposition of local atomic arrangements around Bi atoms in each model structure shown in (a) – (c); the local atomic arrangements are down within  $z \pm 0.6 \text{ \AA}$ .

Table S1. Atomic coordinates used for preparation of small  $\beta$ -cell structure, which are taken from ref. 19. The lattice constants and space group ( $C2/m$  (No. 12)) taken from ref. 19 are  $a = 11.4316(7)$  Å,  $b = 8.3872(4)$  Å,  $c = 12.0157(3)$  Å, and  $\beta = 89.225(4)^\circ$ .

| atom  | site | $x$      | $y$       | $z$      |
|-------|------|----------|-----------|----------|
| Bi(1) | $4i$ | 0.127(5) | 0         | 0.384(2) |
| Bi(2) | $4i$ | 0.379(5) | 0         | 0.119(2) |
| Bi(3) | $4i$ | 0.625(4) | 0         | 0.390(2) |
| Bi(4) | $4i$ | 0.873(4) | 0         | 0.112(2) |
| Rh(1) | $4e$ | 0.25     | -0.25     | 0        |
| Rh(2) | $4f$ | 0.25     | 0.25      | 0.5      |
| Rh(3) | $4h$ | 0.5      | -0.262(9) | 0.5      |
| Rh(4) | $4g$ | 1        | -0.263(9) | 0        |
| Rh(5) | $4i$ | 0.372(2) | 0         | 0.379(4) |
| Rh(6) | $4i$ | 0.124(2) | 0         | 0.118(4) |
| Se(1) | $8j$ | 0.372(6) | -0.276(6) | 0.332(2) |
| Se(2) | $8j$ | 0.129(6) | -0.278(5) | 0.165(2) |

Table S2. Atomic coordinates used for preparation of large  $\beta$ -cell structure, which are taken from the atomic coordinates at 293 K listed in Table II of ref. 23. The lattice constants of  $\text{Bi}_2\text{Rh}_3\text{Se}_2$  (large  $\beta$ -cell structure) shown in ref. 18 are  $a = 11.413(1) \text{ \AA}$ ,  $b = 8.368(2) \text{ \AA}$ ,  $c = 8.336(1) \text{ \AA}$  and  $\beta = 134.05(4)^\circ$ . The space group is assumed as  $C2/m$  (No. 12). Here, the S atom in the atomic coordinates listed in ref. 23 is replaced by Se.

| atom  | site | $x$       | $y$       | $z$       |
|-------|------|-----------|-----------|-----------|
| Bi(1) | 4i   | 0.0002(1) | 0         | 0.2518(2) |
| Bi(2) | 4i   | 0.5086(1) | 0         | 0.2596(2) |
| Rh(1) | 4f   | 0.25      | 0.25      | 0.5       |
| Rh(2) | 4i   | 0.2472(1) | 0         | 0.2472(2) |
| Rh(3) | 4h   | 0         | 0.2411(2) | 0.5       |
| Se(2) | 8j   | 0.2235(6) | 0.2704(5) | 0.187(1)  |

Table S3. Atomic coordinates used for preparation of supercell structure, which are taken from the atomic coordinates of  $\text{Bi}_2\text{Rh}_3\text{S}_2$  listed in Table II of ref. 23. The lattice constants are converted to  $\text{Bi}_2\text{Rh}_3\text{Se}_2$  from the lattice constants of  $\text{Bi}_2\text{Rh}_3\text{S}_2$  (supercell structure) at 120 K listed in Table I of ref. 23;  $a = 11.6667 \text{ \AA}$ ,  $b = 8.331 \text{ \AA}$ ,  $c = 18.6495 \text{ \AA}$  and  $\beta = 107.614^\circ$ . The space group is assumed as  $C2/m$  (No. 12). Here, the S atom in the atomic coordinates listed in ref. 23 is replaced by Se.

| atom  | site | $x$       | $y$        | $z$       |
|-------|------|-----------|------------|-----------|
| Bi(1) | $4i$ | 0.0709(1) | 0          | 0.4167(1) |
| Bi(2) | $4i$ | 0.2432(1) | 0          | 0.2599(1) |
| Bi(3) | $4i$ | 0.4026(1) | 0          | 0.0830(1) |
| Bi(4) | $4i$ | 0.5778(1) | 0          | 0.4148(1) |
| Bi(5) | $4i$ | 0.7383(1) | 0          | 0.2464(1) |
| Bi(6) | $4i$ | 0.9041(1) | 0          | 0.0831(1) |
| Rh(1) | $8j$ | 0.3196(2) | 0.2470(3)  | 0.1674(1) |
| Rh(2) | $8j$ | 0.4092(2) | 0.2517(3)  | 0.3347(1) |
| Rh(3) | $4i$ | 0.1550(3) | 0          | 0.0983(1) |
| Rh(4) | $4i$ | 0.1802(3) | 0          | 0.5923(2) |
| Rh(5) | $4i$ | 0.4860(3) | 0          | 0.2499(2) |
| Rh(6) | $4h$ | 0         | 0.2670(5)  | 0.5       |
| Rh(7) | $4e$ | 0.25      | 0.25       | 0         |
| Se(1) | $8j$ | 0.0187(6) | 0.2265(10) | 0.2464(4) |
| Se(2) | $8j$ | 0.1262(6) | 0.2706(10) | 0.0806(4) |
| Se(3) | $8j$ | 0.3000(6) | 0.2299(9)  | 0.4232(4) |
